# Supplementary material for: Analysis of structural variants in four African Cichlids highlights an association with developmental and immune related genes
Source: bioRxiv or medRxiv preprint supplement (doi:10.1101/473710), 2018-11-24
Supplement: Supplementary file [file media-1.pdf]

Quality check  
(FASTQC)

Quality trimming  
(fastx toolkit)

Align to  
reference  
(Gmap)

Breakdancer

Delly 2

Pindel

Filtering

pairwise intersection  
of results

Selection of SV events  
predicted by  
at least two tools
