# Supplementary material for: Analysis of structural variants in four African Cichlids highlights an association with developmental and immune related genes
Source: bioRxiv or medRxiv preprint supplement (doi:10.1101/473710), 2018-11-24

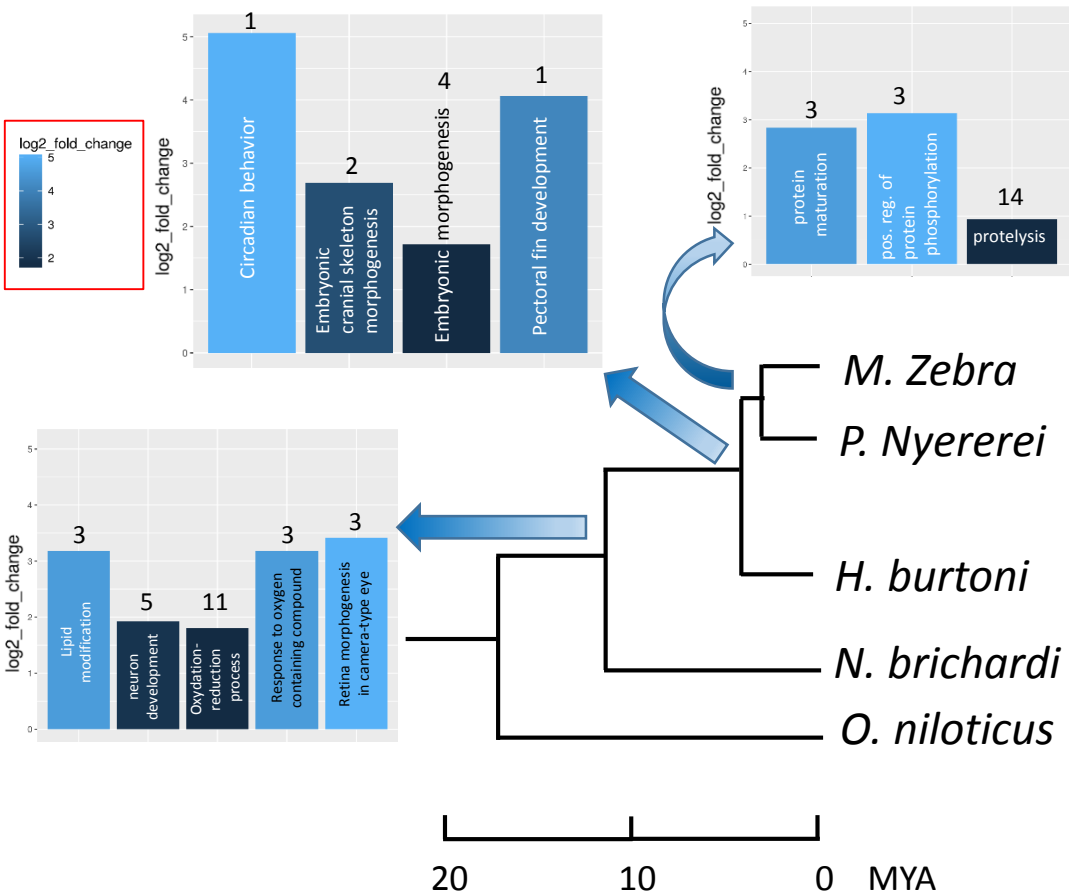

Supplement: Supplementary file [file media-2.pdf]
