# Supplementary material for: Analysis of structural variants in four African Cichlids highlights an association with developmental and immune related genes
Source: bioRxiv or medRxiv preprint supplement (doi:10.1101/473710), 2018-11-24
Supplement: Supplementary file [file media-4.pdf]

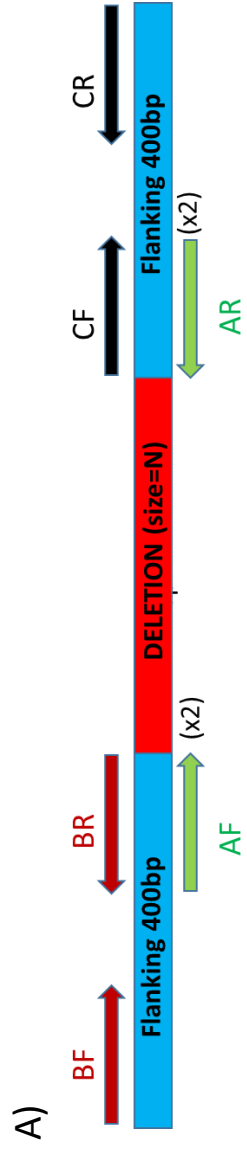

# Run 1

DELETION 1

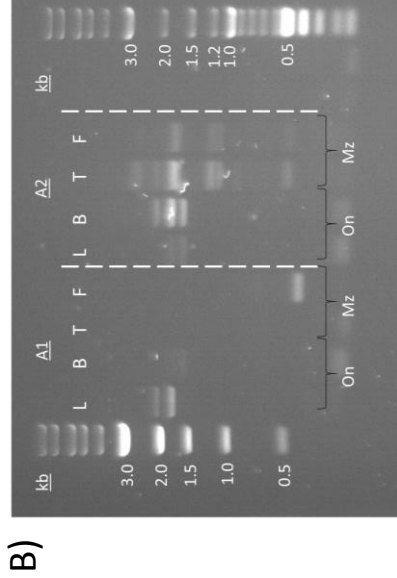

DELETION 2

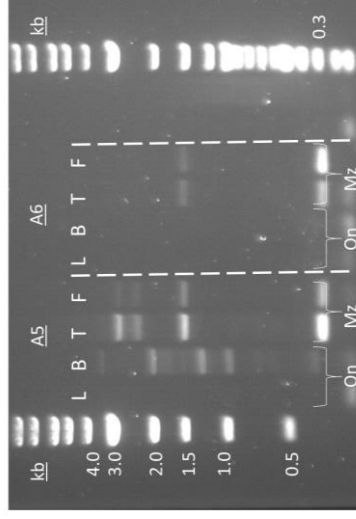

DELETION 3

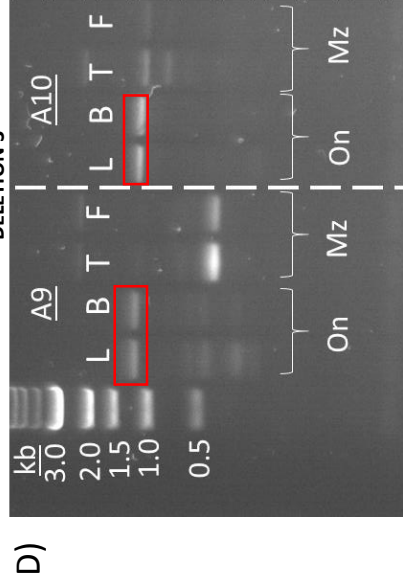

DELETION 4

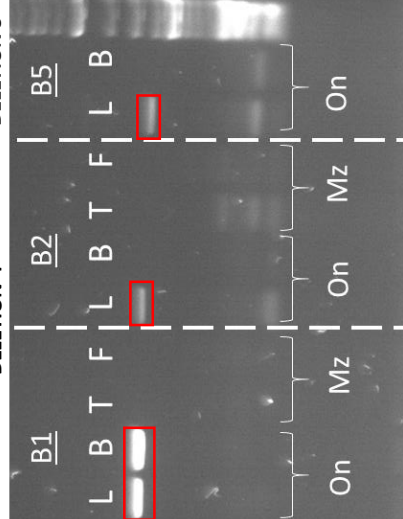

DELETION 5

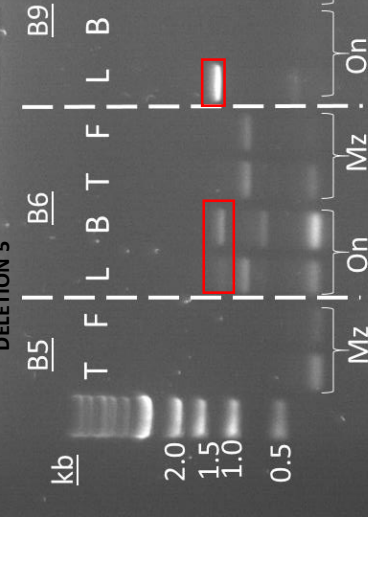

DELETION 6

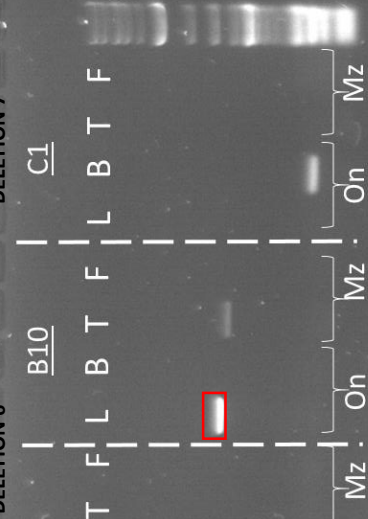

DELETION 7



## Key

L = liver, B = brain, T = Testis, F = fin, Til = Tilapia, Mz = *M. zebra*

E)

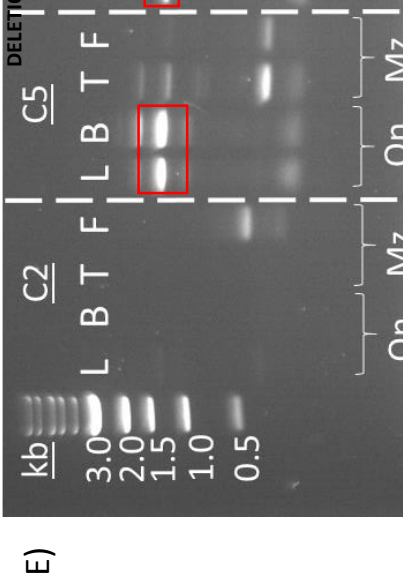

DELETION 9

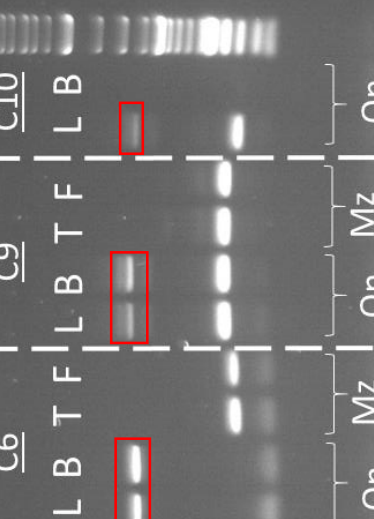

DELETION 10

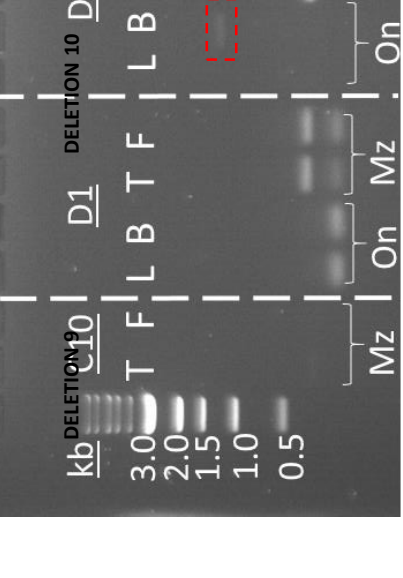

negatives
